# Supplementary material for: MAROCOVID: Snapshot Monitoring of Knowledge and Perceptions of Safety Behaviors during the COVID-19 Outbreak in Morocco
Source: MDPI journal article supplement (doi:10.3390/ijerph18115745), 2021-05-27
Supplement: s1 [file s1]

# MAROCOVID: Snapshot monitoring of knowledge and perceptions of safety behaviors during the COVID-19 outbreak in Morocco

Imane Berni <sup>1,\*,+</sup>, Aziza Menouni <sup>1,2,\*,+</sup>, Younes Filali Zegzouti <sup>1</sup>, Marie-Paule Kestemont <sup>3</sup>, Lode Godderis <sup>2,4</sup> and Samir El Jaafari <sup>1</sup>

<sup>1</sup> Cluster of Competency "Health and Environment", Moulay Ismail University, Meknes 50000, Morocco; y.filalizegzouti@fste.umi.ac.ma (Y.F.Z.); s.eljaafari@umi.ac.ma (S.E.J.)

<sup>2</sup> Environment and Health Unit, Department of Public Health and Primary Care, Katholieke Universiteit Leuven, 3000 Leuven, Belgium; lode.godderis@kuleuven.be

<sup>3</sup> Institute for the Analysis of Change in Contemporary and Historical Societies, Université Catholique de Louvain, 1348 Louvain-la-Neuve, Belgium; marie-paule.kestemont@uclouvain.be

<sup>4</sup> IDEWE, External Service for Prevention and Protection at Work, 3001 Heverlee, Belgium

\* Correspondence: imane.berni@gmail.com (I.B.); aziza.menouni@kuleuven.be (A.M.)

+ These authors contributed equally to this work and are co-first authors.

Table S1: Knowledge about COVID-19 among Moroccan public.

| Question                                                                              | Yes          | No          | I do not no |
|---------------------------------------------------------------------------------------|--------------|-------------|-------------|
| Is COVID-19 pandemic contagious?                                                      | 12087 (85,2) | 207 (1,5)   | 1863 (13,2) |
| Is COVID-19 pandemic caused by a virus?                                               | 7110 (50,2)  | 1197 (8,5)  | 5850 (41,3) |
| Is there a vaccine against COVID-19?                                                  | 7740(54,7)   | 1701 (12)   | 4716 (33,3) |
| Is there an effective treatment for people who have COVID-19                          | 2025 (14,3)  | 7947 (56,1) | 4185 (29,6) |
| Possible to contrast COVID-19 by:                                                     |              |             |             |
| - Being close contrast with someone with COVID-19                                     | 13644 (96,4) | 135 (1)     | 378 (2,7)   |
| -Touching objects or surfaces that have been in contact with someone who has COVID-19 | 13536 (95,6) | 216 (1,5)   | 405 (2,9)   |
| Shaking hand with someone who is an active case of COVID-19                           | 13545 (95,7) | 261 (1,8)   | 351 (2,5)   |
| Symptoms of the COVID-19 are:                                                         |              |             |             |
| -Fever                                                                                | 13518 (95,5) | 198 (1,4)   | 441 (3,1)   |
| -Cough                                                                                | 13464 (95,1) | 216 (1,5)   | 477 (3,4)   |
| - Breathing difficulty                                                                | 13473 (95,2) | 342 (2,4)   | 342 (2,4)   |
| - Sore throat                                                                         | 12051 (85,1) | 531 (3,8)   | 1557 (11,1) |
| -Diarrhea                                                                             | 7641 (54)    | 3096 (21,9) | 3420 (24)   |
| -Lack of appetite / Headaches                                                         | 6939 (49)    | 2475 (17,5) | 2743 (33,5) |
| -Loss of smell / Fatigue                                                              | 9774 (69)    | 1656 (11,7) | 2727 (19,3) |
| 14 days is the incubation period for COVID-19                                         | 4500 (31,8)  | 2448 (17,3) | 7209 (50,9) |
| COVID-19 can affect people more than one in life                                      | 4968 (35,1)  | 3015 (21,3) | 6174 (43,6) |

Table S2. Descriptive statistics of key variables toward COVID-19 (n=14 157)

| Factors                               | Variable description                                                                            | Mean (SD)   |
|---------------------------------------|-------------------------------------------------------------------------------------------------|-------------|
| <b>Severity of COVID-19</b>           |                                                                                                 |             |
|                                       | I think that COVID-19 put several threats to human health                                       | 4,44 (0,88) |
|                                       | I believe that if I catch COVID-19 it will have a serious consequence for my life               | 4,24 (0,86) |
|                                       | I believe that COVID-19 can lead to death of my loves one if they get infected                  | 4,02 (0,80) |
| <b>Cronbach's <math>\alpha</math></b> |                                                                                                 | 0,76        |
| <b>Influence of Media</b>             |                                                                                                 |             |
|                                       | I think media platforms are fulfilling their job in raising awareness                           | 4,1 (1,01)  |
|                                       | I think that the media have over-exaggerated the risks of catching COVID-19                     | 3,42 (1,0)  |
|                                       | I follow the information about COVID-19 from Television and radio                               | 2,48 (0,9)  |
|                                       | I follow the information about COVID-19 from Internet and social media (Facebook, Twitter, ...) | 3,1 (0,8)   |
| <b>Cronbach's <math>\alpha</math></b> |                                                                                                 | 0,69        |
| <b>Control</b>                        |                                                                                                 |             |
|                                       | I may decrease my risk to catch COVID-19                                                        | 4,34 (0,77) |
|                                       | My behavior can prevent transmission                                                            | 4,02 (0,96) |
|                                       | I know how to protect myself and my beloved one                                                 | 4,38 (0,9)  |
| <b>Cronbach's <math>\alpha</math></b> |                                                                                                 | 0,87        |
| <b>Subjective norms</b>               |                                                                                                 |             |
|                                       | The way that others think about COVID-19 is important to me                                     | 4,00 (0,99) |
|                                       | My family discourages me to go out in this period                                               | 4,38 (0,96) |
|                                       | My close friends confirm that COVID-19 is a serious disease                                     | 3,68 (1,01) |
|                                       | I feel like under social pressure to wash my hand many times                                    | 3,68 (1,06) |
|                                       | The persons I most respect, wear mask while going out                                           | 3,53 (1,22) |
| <b>Cronbach's <math>\alpha</math></b> |                                                                                                 | 0,78        |
| <b>Timeline of COVID-19</b>           |                                                                                                 |             |
|                                       | In my opinion, COVID-19 is going to continue for a long time                                    | 4,74 (0,67) |
|                                       | In my opinion, COVID-19 will be successfully controlled                                         | 1,8 (0,33)  |
|                                       | In my opinion, confirmed cases and mortality caused by COVID-19 will increase                   | 4,26 (0,89) |
|                                       | In my opinion, the lockdown will still until July                                               | 4,41 (1,05) |

|                                       |                                                                                                  |             |
|---------------------------------------|--------------------------------------------------------------------------------------------------|-------------|
|                                       | In my opinion, Airspace will remain closed for six months at least                               | 4,23 (0,71) |
| <b>Cronbach's <math>\alpha</math></b> |                                                                                                  | 0,86        |
| <b>Confidence in the authorities</b>  |                                                                                                  |             |
|                                       | I think the authorities act in the interest of the public in dealing with COVID-19               | 3,89 (1,36) |
|                                       | I think politicians usually tell us the true number of confirmed and death cases                 | 3,94 (1,27) |
|                                       | I think government closely monitor all citizens during COVID-19                                  | 3,92 (1,28) |
|                                       | I think government of Morocco is handling the COVID-19 health and socioeconomic crisis very well | 2,04 (1,23) |
|                                       | I'm confident that Morocco can win the battle against the COVID-19 pandemic                      | 2,11 (1,16) |
| <b>Cronbach's <math>\alpha</math></b> |                                                                                                  | 0,89        |
| <b>Lack of medications</b>            | Nothing can be done to treat people with COVID-19                                                | 4,5 (0,74)  |
| <b>Clear information</b>              | The information I have heard about COVID-19 has been obvious                                     | 4,0 (0,9)   |

Table S3. Correlation between attitudes and behavior during COVID-19 pandemic

| Factors                                                             | Association with<br>carrying out> 5<br>recommended<br>behaviours | Association with<br>carrying out> 1<br>advised behaviours |
|---------------------------------------------------------------------|------------------------------------------------------------------|-----------------------------------------------------------|
|                                                                     | Odds ratio (95%CI)                                               | Odds ratio (95%CI)                                        |
| I think that, ..... reduce my risk of catching<br>Covid-19 pandemic |                                                                  |                                                           |
| Avoiding going out                                                  | 0,92 (0,86-0,98)                                                 | 0,85 (0,84-0,95)                                          |
| Using gloves and face mask when outing public                       | 1,04 (0,99-1,08)                                                 | 0,99 (0,95-1,04)                                          |
| Washing hand regularly with soap and water                          | 0,98 (0,95-1,02)                                                 | 0,97 (0,93-1,01)                                          |
| Avoiding shopping at supermarket and crowded<br>place               | 1,00 (0,98-1,01)                                                 | 0,95 (0,92-0,98)                                          |
| Following a healthy diet could boost my immune<br>system            | 0,97 (0,95-1,00)                                                 | 0,92 (0,91-0,99)                                          |

Table S4. Correlation between knowledge, attitude and behavior

| Relationship between |                | Coefficient of correlation |
|----------------------|----------------|----------------------------|
| Knowledge score      | Attitude score | 0.492                      |
| Knowledge score      | Behavior       | 0.674                      |
| Behavior             | Attitude score | 0.443                      |
